# Supplementary material for: Deciphering hepatoma cell resistance to tyrosine kinase inhibitors: insights from a Liver-on-a-Chip model unveiling tumor endothelial cell mechanisms
Source: Royal Society of Chemistry journal article supplement (doi:10.1039/d4lc00238e), 2024-01-01
Supplement: d4lc00238e1.pdf [file d4lc00238e1.pdf]

Supplementary Material (ESI) for Lab on a Chip

# Deciphering Hepatoma Cell Resistance to Tyrosine Kinase Inhibitors: Insights from a Liver-on-a-Chip Model Unveiling Tumor Endothelial Cell Mechanisms

Madhu Shree Poddar,<sup>a</sup> Yu-De Chu,<sup>bcd</sup> Chau-Ting Yeh,<sup>bcd</sup> Cheng-Hsien Liu<sup>\*aef</sup>

<sup>a</sup>Institute of Nanoengineering and Microsystems, National Tsing Hua University, Hsinchu, 30044, Taiwan, R.O.C.

<sup>b</sup>Liver Research Center, Chang Gung Memorial Hospital, Taoyuan 333, Taiwan, R.O.C.

<sup>c</sup>Molecular Medicine Research Center, Chang Gung University, Taoyuan 333, Taiwan, R.O.C.

<sup>d</sup>Institute of Stem Cell and Translational Cancer Research, Chang Gung Memorial Hospital, Taoyuan 333, Taiwan, R.O.C

<sup>e</sup>Department of Power Mechanical Engineering, National Tsing Hua University, Hsinchu 30044, Taiwan, R.O.C.

<sup>f</sup>College of Semiconductor Research, National Tsing Hua University, Hsinchu 30044, Taiwan, R.O.C.

\*E-mail: liuch@pme.nthu.edu.tw

## Supplementary Figures

Figure S1.

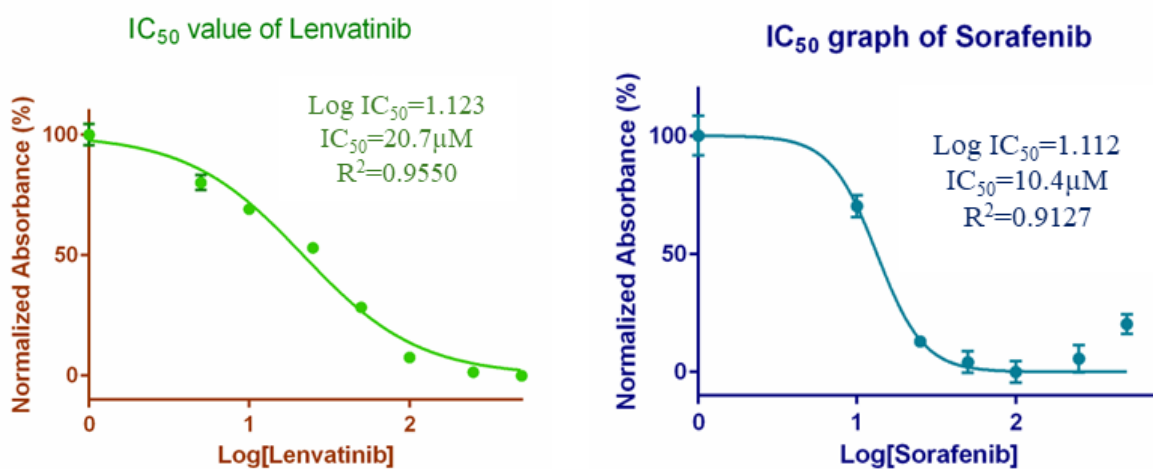

The IC<sub>50</sub> values of Lenvatinib and Sorafenib are 20.7μM and 10.4 μM, respectively.

Figure S2.

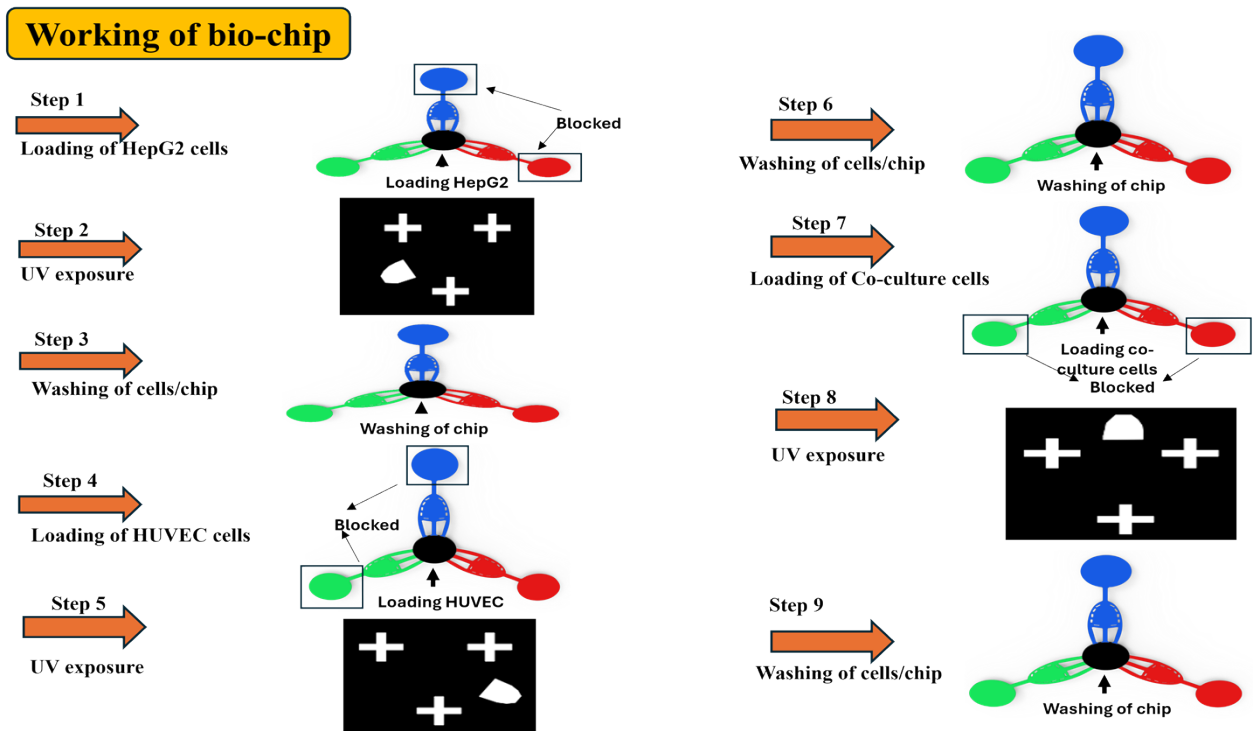

The step by step working process for our liver-chip.
